# Supplementary material for: Discharge Performance of Zinc-Air Flow Batteries Under the Effects of Sodium Dodecyl Sulfate and Pluronic F-127
Source: PubMed Central journal article supplement (PMC6175836; doi:10.1038/s41598-018-32806-3), 2018-10-08
Supplement: 41598_2018_32806_MOESM1_ESM.pdf [file 41598_2018_32806_MOESM1_ESM.pdf]

Discharge Performance of Zinc-Air Flow Batteries Under the Effects of Sodium Dodecyl Sulfate and Pluronic F-127

Soraya Hosseini<sup>1</sup>, Woranunt Lao-atiman<sup>1</sup>, Siow Jing Han<sup>1,3</sup>, Amornchai Arpornwichanop<sup>1,2</sup>, Tetsu Yonezawa<sup>4</sup>, and Soorathep Kheawhom<sup>1,2,\*</sup>

<sup>1</sup>Department of Chemical Engineering, Faculty of Engineering, Chulalongkorn University, Bangkok 10330, Thailand

<sup>2</sup>Computational Process Engineering Research Unit, Chulalongkorn University, Bangkok 10330, Thailand

<sup>3</sup>Department of Chemical Engineering, Faculty of Engineering, University Technology PETRONAS, Seri Iskandar, Perak 32610, Malaysia

<sup>4</sup>Division of Materials Science and Engineering, Faculty of Engineering, Hokkaido University, Kita 13 Nishi 8, Sapporo, Hokkaido, 060-8628, Japan

\*soorathep.k@chula.ac.th

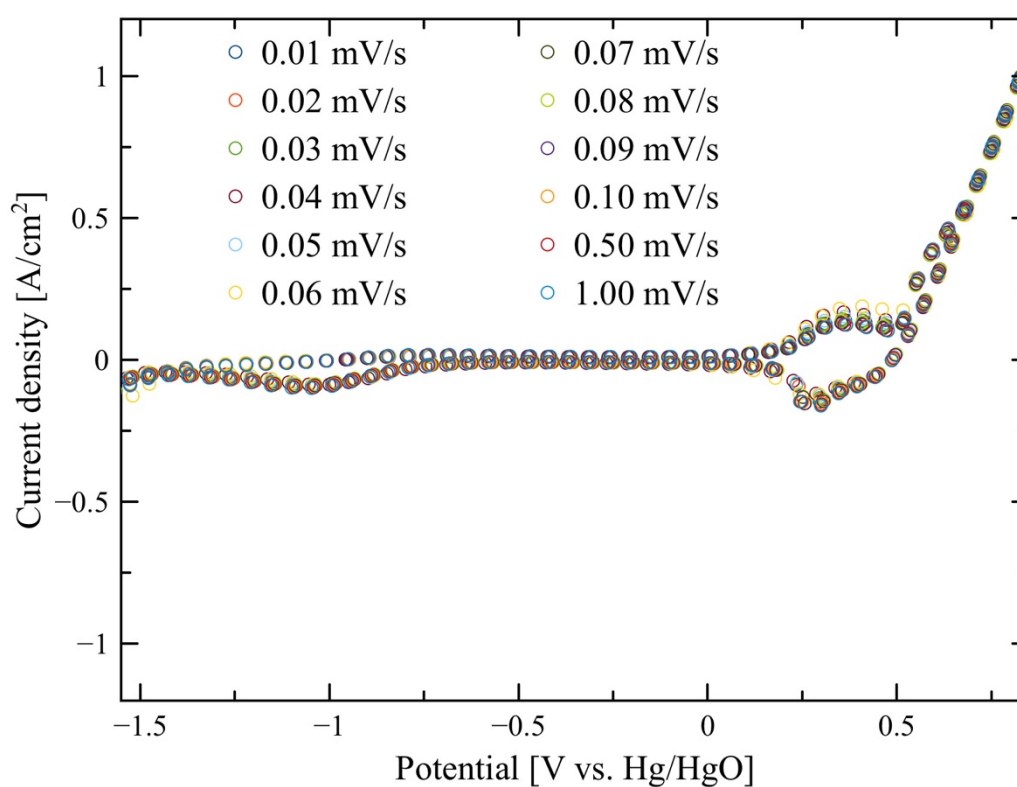

Fig. S1 The effects of scan rate on the voltammetric behavior of a stainless steel mesh cylinder in KOH electrolyte.

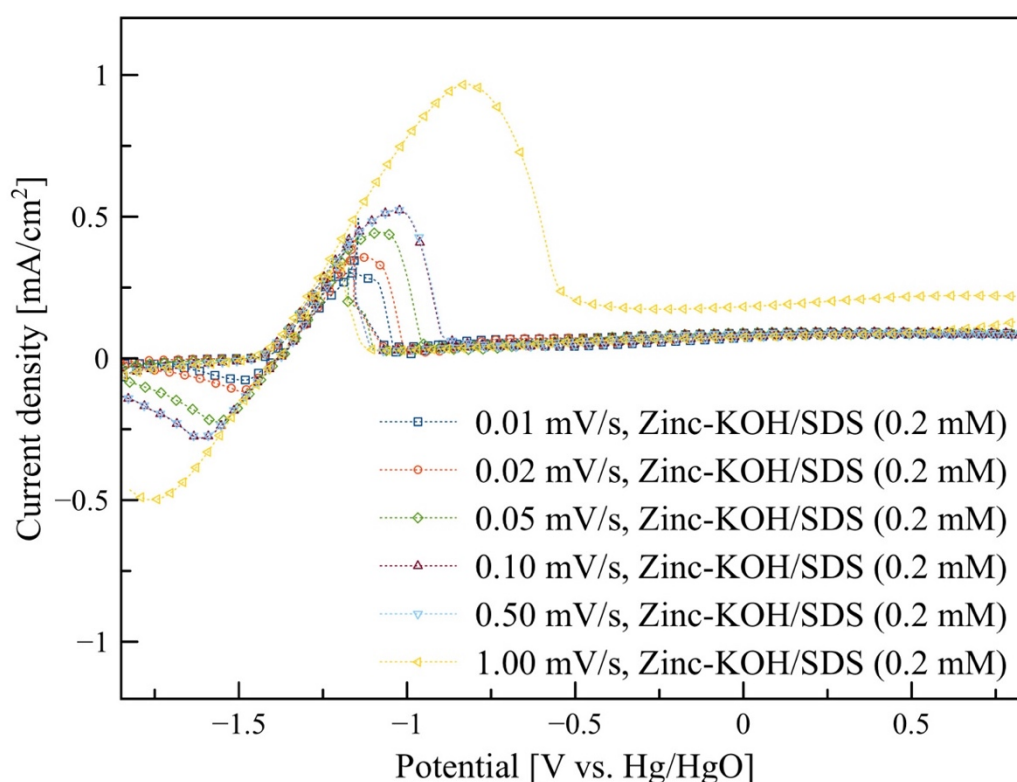

Fig. S2 The effects of scan rate on the voltammetric behavior of zinc plate in the KOH-SDS electrolyte (0.2 mM SDS).

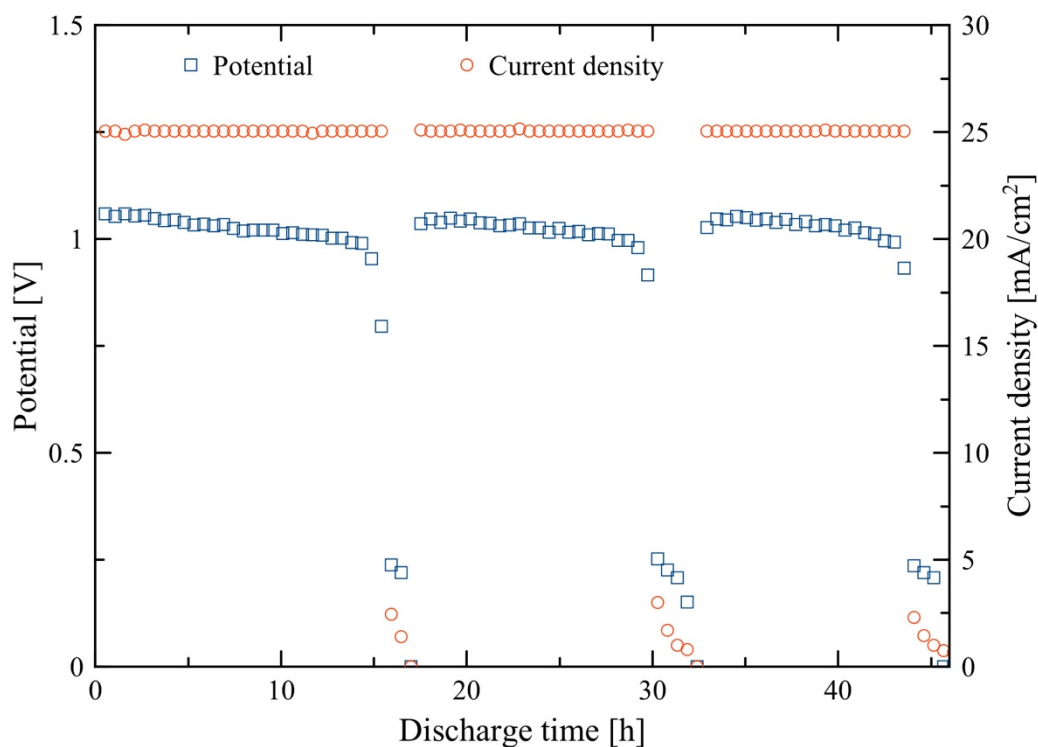

Fig. S3 Multiple galvanostatic discharge profile of the battery using SDS/zinc-KOH (0.2 mM SDS) with the electrolyte circulation rate of 150 mL/min at the discharge current density of 25 mA/cm<sup>2</sup>.
